# Supplementary material for: VAR2CSA binding phenotype has ancient origin and arose before Plasmodium falciparum crossed to humans: implications in placental malaria vaccine design
Source: PubMed Central journal article supplement (PMC6861233; doi:10.1038/s41598-019-53334-8), 2019-11-18

**VAR2CSA binding phenotype has ancient origin and arose before *Plasmodium falciparum* crossed to humans: implications in placental malaria vaccine design**

Stéphane Gangnard, Arnaud Chêne, Sébastien Dechavanne, Anand Srivastava,  
Marion Avril, Joseph D. Smith, Benoît Gamain

SUPPLEMENTARY INFORMATION

# SUPPLEMENTARY FIGURE S1

## a. ClustalW multiple sequence alignment of DBL1x-2x

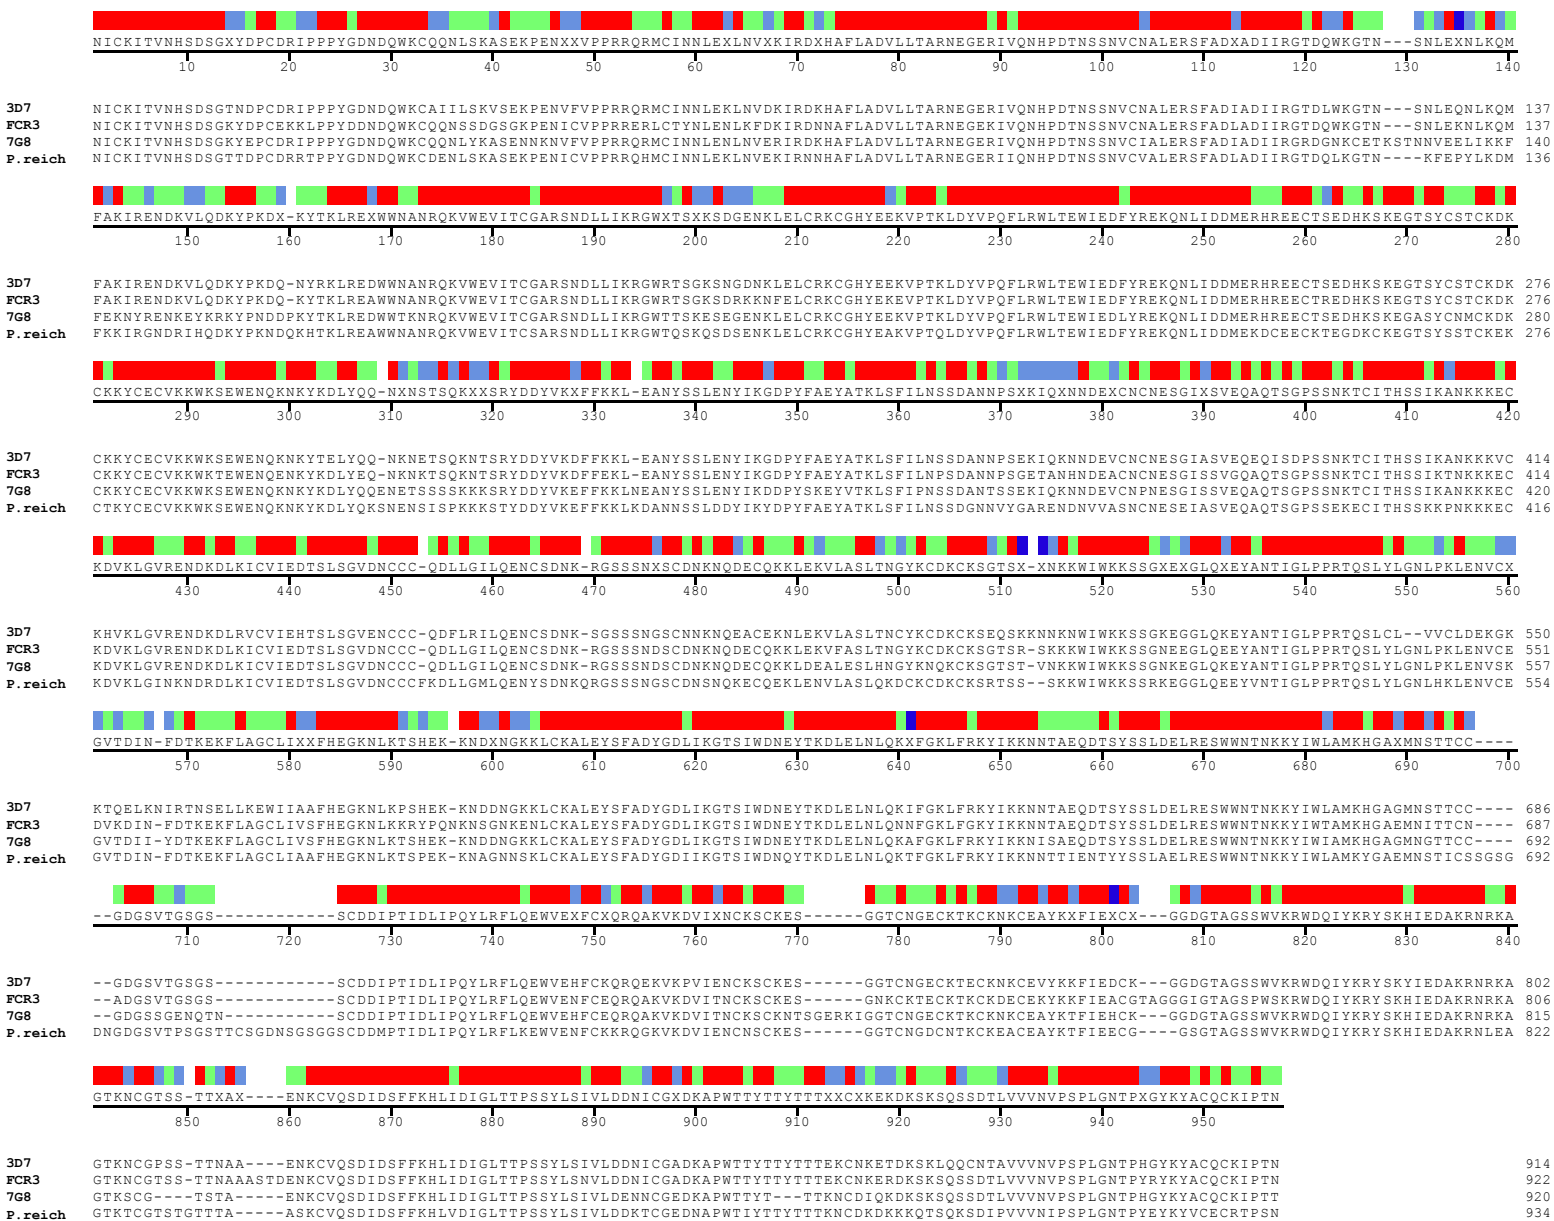

## b. Sequence pair distances of DBL1x-DBL2x - percent Identity

|                 | Pf3D7-DBL1x-2x | PfFCR3-DBL1x-2x | Pf7G8-DBL1x-2x |
|-----------------|----------------|-----------------|----------------|
| Pr-VAR2CSA      | 75%            | 76.9%           | 75.4%          |
| Pf3D7-DBL1x-2x  |                | 82.2%           | 80.9%          |
| PfFCR3-DBL1x-2x |                |                 | 80.2%          |

# SUPPLEMENTARY FIGURE S2

## Surface Plasmon Resonance sensorgrams

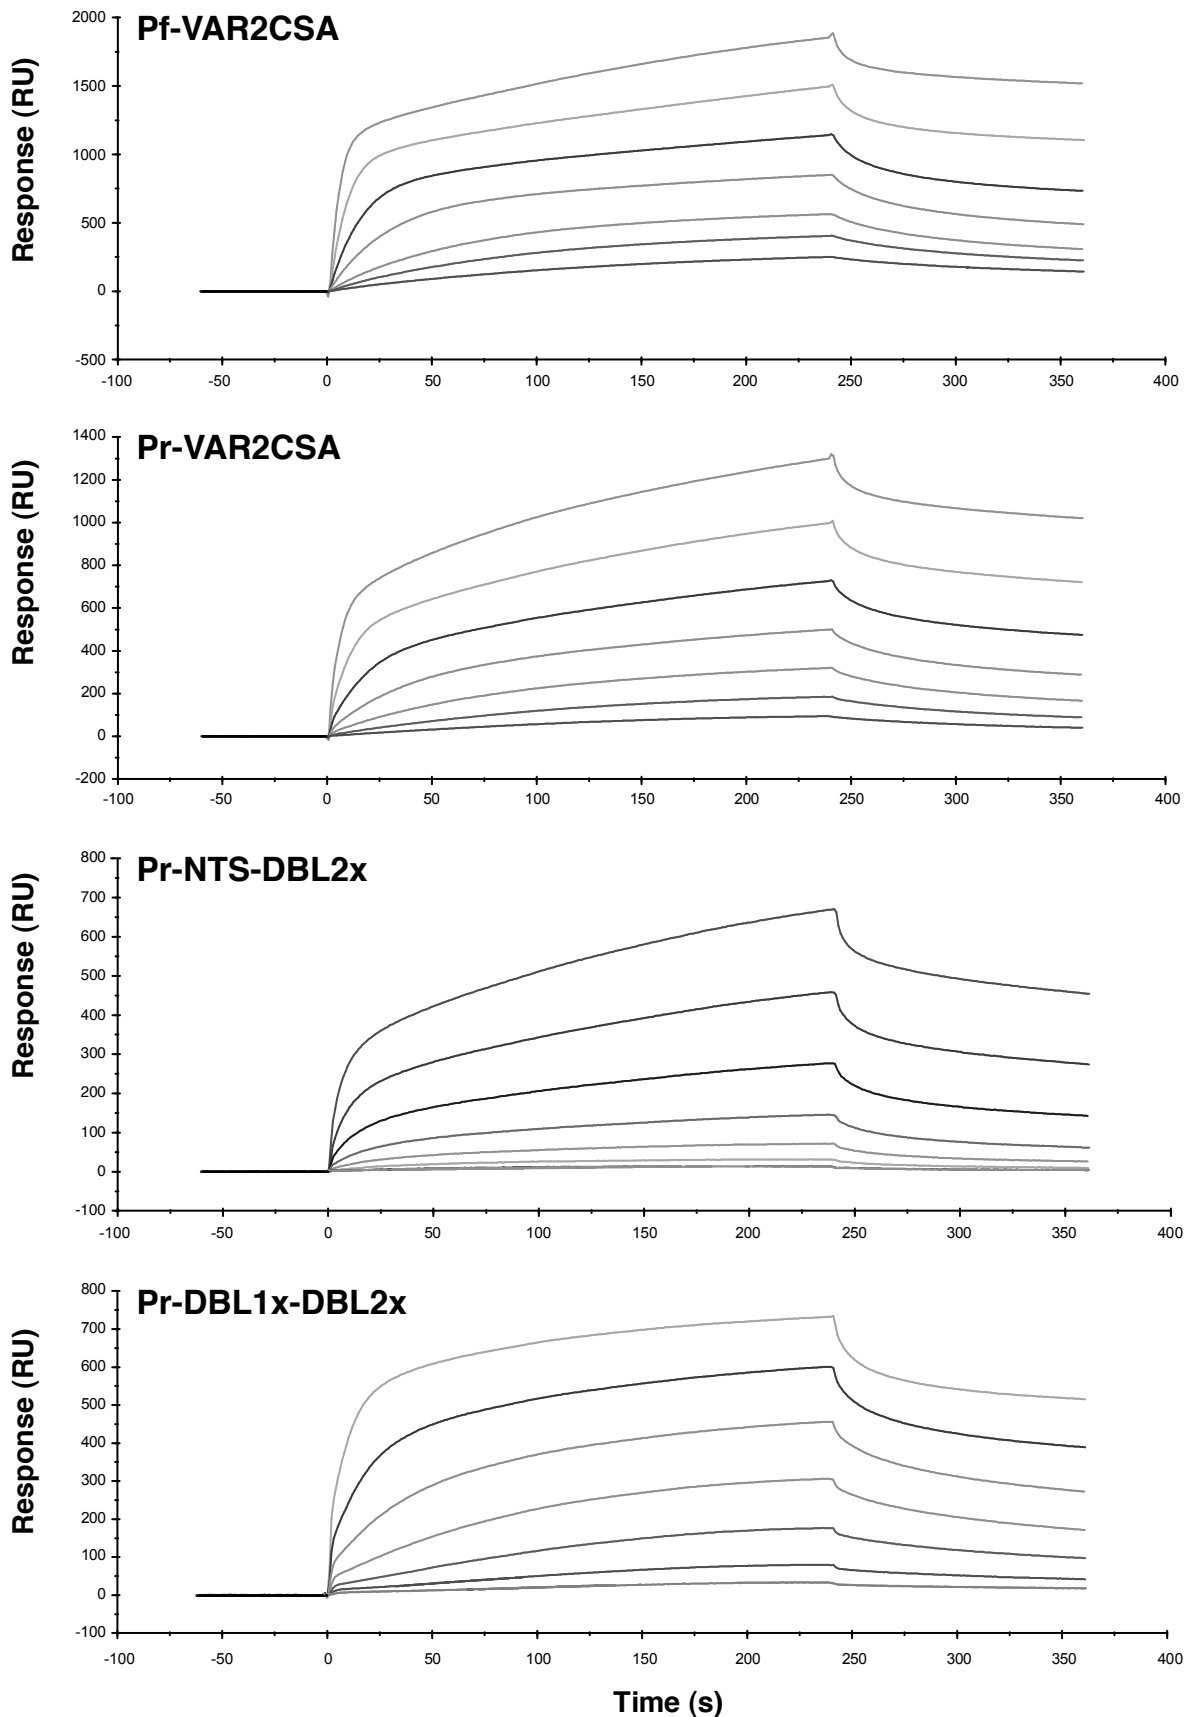

The CSA-carrying protein decorin was immobilized on a SA chip. Analytes were injected at different concentrations ranging from 11 nM to 0.75 M.

# SUPPLEMENTARY FIGURE S3

Immunization scheme with Pr-VAR2CSA  
Rabbits and Rats

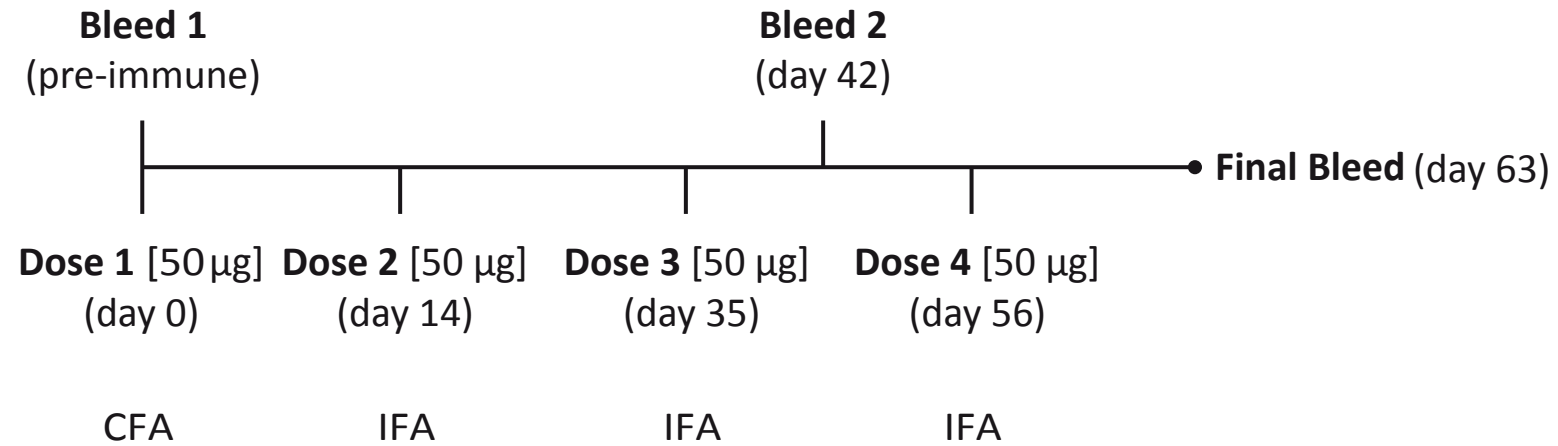

CFA: Complete Freund Adjuvant  
IFA: Incomplete Freund Adjuvant

**FULL-LENGTH ORIGINAL GELS FROM FIGURE 1B**

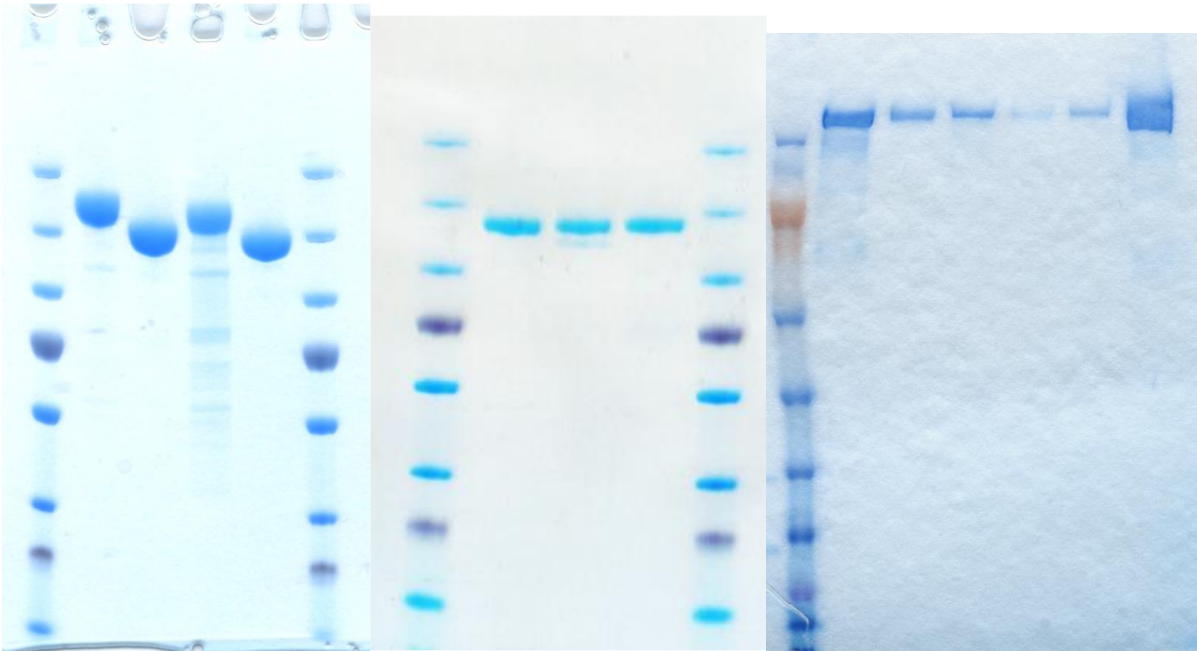

Supplement: 41598_2019_53334_MOESM1_ESM.pdf [file 41598_2019_53334_MOESM1_ESM.pdf]
